# Supplementary material
Source: PubMed Central journal article supplement (PMC7277959)
Supplement: NIHMS1068239-supplement-Supplement_Table.pdf [file NIHMS1068239-supplement-Supplement_Table.pdf]

**Electronic supplementary material Table 1 (ESM Table 1):** Associations between change in laboratory values from 34-37 weeks gestation to 1-5 days postpartum and change in insulin sensitivity, insulin response, and disposition index from 34-37 weeks gestation to 1-5 days postpartum

|                                                                                                                                   | <b>ΔInsulin Sensitivity</b> | <b>ΔInsulin Response</b> | <b>ΔDisposition Index</b> |
|-----------------------------------------------------------------------------------------------------------------------------------|-----------------------------|--------------------------|---------------------------|
| <b>ΔCholesterol (mmol/l)</b>                                                                                                      | -0.09                       | -0.28                    | -0.03                     |
| <b>ΔTriglyceride (mmol/l)</b>                                                                                                     | -0.05                       | -0.22                    | 0.00                      |
| <b>Δ HDL- cholesterol (mmol/l)</b>                                                                                                | -0.21                       | -0.05                    | -0.13                     |
| <b>Δ LDL- cholesterol (mmol/l)</b>                                                                                                | -0.11                       | -0.27                    | -0.12                     |
| <b>Δ VLDL- cholesterol (mmol/l)</b>                                                                                               | -0.05                       | -0.22                    | 0.00                      |
| <b>ΔCRP (nmol/l)</b>                                                                                                              | -0.31                       | -0.12                    | -0.21                     |
| <b>ΔIL-6 (pg/ml)</b>                                                                                                              | 0.21 (N = 26)               | -0.11 (N = 26)           | 0.32 (N = 26)             |
| <b>ΔIL-8 (pg/ml)</b>                                                                                                              | 0.03 (N = 25)               | 0.06 (N = 25)            | 0.11 (N = 25)             |
| <b>ΔAdiponectin (ng/ml)</b>                                                                                                       | -0.11 (N = 26)              | 0.06 (N = 26)            | -0.06 (N = 26)            |
| <b>ΔLeptin (ng/ml)</b>                                                                                                            | 0.23                        | -0.40*                   | -0.09                     |
| <b>ΔTNF-alpha (pg/ml)</b>                                                                                                         | 0.05 (N = 25)               | -0.13 (N = 25)           | -0.05 (N = 25)            |
| <b>ΔBMI (kg/m<sup>2</sup>)</b>                                                                                                    | 0.39 (N = 24)               | 0.07 (N = 24)            | 0.24 (N = 24)             |
| <b>Note:</b> Unless otherwise noted, Valid N = 27 for all associations. Associations are Spearman correlations. * <i>p</i> < .05. |                             |                          |                           |

**Electronic supplementary material Table 2 (ESM Table 2):** Associations between change in laboratory values from 1-5 days postpartum to 6-12 weeks postpartum and change in insulin sensitivity, insulin response, and disposition index from 1-5 days postpartum to 6-12 weeks postpartum

|                                                                                                                               | <b>ΔInsulin Sensitivity</b> | <b>ΔInsulin Response</b> | <b>ΔDisposition Index</b> |
|-------------------------------------------------------------------------------------------------------------------------------|-----------------------------|--------------------------|---------------------------|
| <b>ΔCholesterol (mmol/l)</b>                                                                                                  | 0.21                        | -0.26                    | 0.15                      |
| <b>ΔTriglyceride (mmol/l)</b>                                                                                                 | -0.10 (N = 26)              | 0.32 (N = 26)            | -0.01 (N = 26)            |
| <b>Δ HDL- cholesterol (mmol/l)</b>                                                                                            | -0.29                       | -0.06                    | -0.25                     |
| <b>Δ LDL- cholesterol (mmol/l)</b>                                                                                            | 0.37                        | -0.32                    | 0.26                      |
| <b>Δ VLDL- cholesterol (mmol/l)</b>                                                                                           | -0.08 (N = 25)              | 0.32 (N = 25)            | 0.00 (N = 25)             |
| <b>ΔCRP (nmol/l)</b>                                                                                                          | -0.36                       | -0.07                    | -0.40                     |
| <b>ΔIL-6 (pg/ml)</b>                                                                                                          | 0.34 (N = 26)               | 0.10 (N = 26)            | 0.36 (N = 26)             |
| <b>ΔIL-8 (pg/ml)</b>                                                                                                          | 0.19 (N = 24)               | 0.09 (N = 24)            | 0.36 (N = 24)             |
| <b>ΔAdiponectin (ng/ml)</b>                                                                                                   | 0.37 (N = 26)               | -0.21 (N = 26)           | 0.26 (N = 26)             |
| <b>ΔLeptin (ng/ml)</b>                                                                                                        | -0.08                       | 0.06                     | -0.10                     |
| <b>ΔTNF-alpha (pg/ml)</b>                                                                                                     | 0.40 (N = 25)               | -0.40* (N = 25)          | 0.17 (N = 25)             |
| <b>ΔBMI (kg/m<sup>2</sup>)</b>                                                                                                | 0.03 (N = 24)               | 0.36 (N = 24)            | 0.21 (N = 24)             |
| <b>Note:</b> Unless otherwise noted, Valid N = 27 for all associations. Associations are Spearman correlations. * $p < .05$ . |                             |                          |                           |

**Electronic supplementary material Table 3 (ESM Table 3):** Associations between change in laboratory values from 34-37 weeks gestation to 6-12 weeks postpartum and change in insulin sensitivity, insulin response, and disposition index from 34-37 weeks gestation to 6-12 weeks postpartum

|                                                                                                                                                                                         | <b>ΔInsulin Sensitivity</b> | <b>ΔInsulin Response</b> | <b>ΔDisposition Index</b> |
|-----------------------------------------------------------------------------------------------------------------------------------------------------------------------------------------|-----------------------------|--------------------------|---------------------------|
| <b>ΔCholesterol (mmol/l)</b>                                                                                                                                                            | -0.29                       | -0.03                    | -0.21                     |
| <b>ΔTriglyceride (mmol/l)</b>                                                                                                                                                           | -0.15 (N = 26)              | -0.02 (N = 26)           | 0.17 (N = 26)             |
| <b>Δ HDL- cholesterol (mmol/l)</b>                                                                                                                                                      | 0.10                        | -0.09                    | -0.08                     |
| <b>Δ LDL- cholesterol (mmol/l)</b>                                                                                                                                                      | -0.14                       | 0.00                     | -0.13                     |
| <b>Δ VLDL- cholesterol (mmol/l)</b>                                                                                                                                                     | -0.16 (N = 25)              | -0.02 (N = 25)           | 0.17 (N = 25)             |
| <b>ΔCRP (nmol/l)</b>                                                                                                                                                                    | -0.01                       | -0.24                    | -0.06                     |
| <b>ΔIL-6 (pg/ml)</b>                                                                                                                                                                    | 0.03                        | -0.21                    | -0.05                     |
| <b>ΔIL-8 (pg/ml)</b>                                                                                                                                                                    | 0.27 (N = 25)               | -0.18 (N = 25)           | 0.24 (N = 25)             |
| <b>ΔAdiponectin (ng/ml)</b>                                                                                                                                                             | 0.03                        | -0.30                    | 0.15                      |
| <b>ΔLeptin (ng/ml)</b>                                                                                                                                                                  | 0.08                        | -0.06                    | 0.01                      |
| <b>ΔTNF-alpha (pg/ml)</b>                                                                                                                                                               | 0.12 (N = 26)               | -0.39 (N = 26)           | -0.19 (N = 26)            |
| <b>ΔBMI (kg/m<sup>2</sup>)</b>                                                                                                                                                          | -0.24                       | 0.00                     | 0.06                      |
| <b>Note:</b> Unless otherwise noted, Valid N = 27 for all associations. Associations are Spearman correlations. No associations are significantly different from zero (all $p > .05$ ). |                             |                          |                           |
